# Supplementary material
Source: PubMed Central journal article supplement (PMC8454753)
Supplement: mmc1.pdf [file mmc1.pdf]

## Supplementary material

### Article title

# **A nationwide analysis of population group differences in the COVID-19 epidemic in Israel, February 2020–February 2021**

Khitam Muhsen PhD,<sup>1\*</sup> Wasef Na'aminh PhD,<sup>1</sup> Yelena Lapidot PhD,<sup>1</sup> Sophy Goren BSc<sup>1</sup>, Yonatan Amir BSc,<sup>1</sup> Saritte Perlman, MPH,<sup>1</sup> Manfred S. Green MBChB,<sup>2</sup> Gabriel Chodick PhD,<sup>1,3</sup> Dani Cohen PhD<sup>1</sup>

<sup>1</sup> Department of Epidemiology and Preventive Medicine, School of Public Health, Sackler Faculty of Medicine, Tel Aviv University, Tel Aviv, 69978

Israel

<sup>2</sup> University of Haifa, School of Public Health, Haifa, Israel

<sup>3</sup> Maccabi Institute for Research & Innovation, Maccabi Healthcare Services, Kaufman 4, Tel Aviv, Israel

**Supplementary figure 1: Number of daily diagnostic PCR tests for the detection of SARS-Cov-2 in Israel, February 2020- February 2021 (N= 10,190,185)**

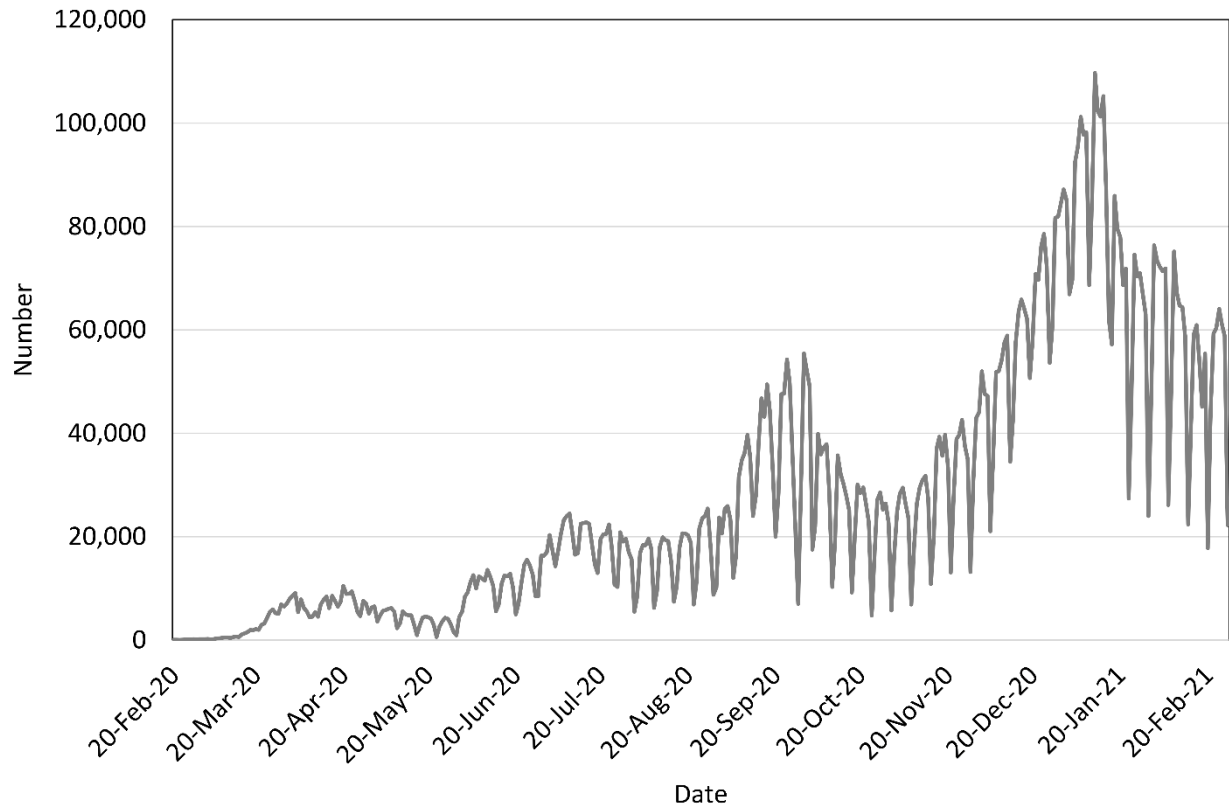

SARS-CoV-2 – severe acute respiratory syndrome coronavirus 2; PCR – Polymerase chain reaction

**Supplementary figure 2: Incidence rates (per 100,000) of PCR-confirmed SARS-CoV-2 infections by sex and age groups, Israel, March 15, 2020-February 27, 2021**

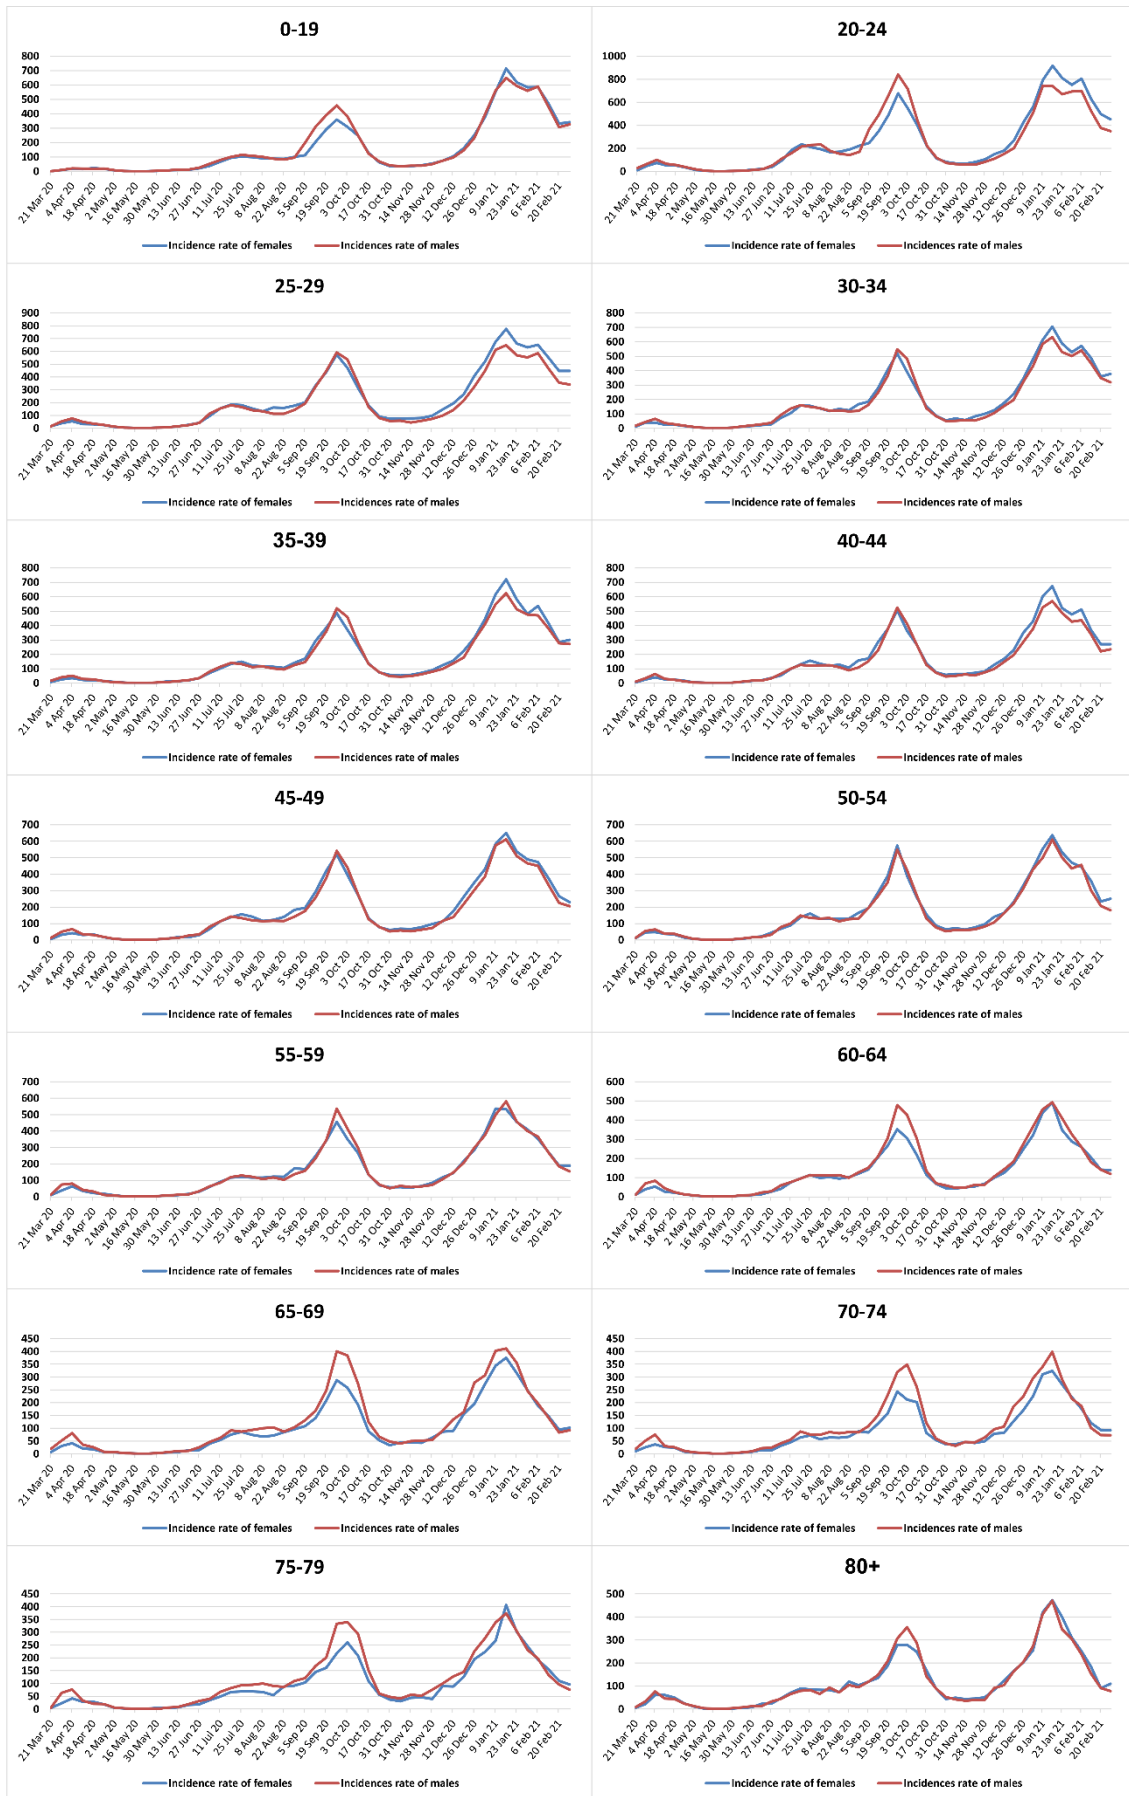

SARS-CoV-2 – severe acute respiratory syndrome coronavirus 2; PCR – Polymerase chain reaction

**Supplementary Table 1: Timeline of COVID-19 restrictions in Israel**

| <u>DATE</u>            | <u>Decision/Event/Limitation</u>                                                                                                                                                                                     | <u>CLASSIFICATION</u>                                          |
|------------------------|----------------------------------------------------------------------------------------------------------------------------------------------------------------------------------------------------------------------|----------------------------------------------------------------|
| <b>JAN 2020</b>        |                                                                                                                                                                                                                      |                                                                |
| 24/01/2020-02/02/2020  | Increasing limitations on travel to China and subsequent border closure                                                                                                                                              | Travel restrictions                                            |
| 25/01/2020-02/02/2020  | Implementation of quarantine laws for travelers returning from China                                                                                                                                                 | Isolation/quarantine guidelines                                |
| 27/01/2020             | MOH signed the People's Health Ordinance Decree                                                                                                                                                                      | Government decision                                            |
| <b>FEB 2020</b>        |                                                                                                                                                                                                                      |                                                                |
| 16/02/2020-22/02/2020  | Expansion of quarantine and isolation order to include additional Asian countries                                                                                                                                    | Isolation/quarantine guidelines                                |
| 23/02/2020             | School delegations to Poland suspended                                                                                                                                                                               | Activity restriction                                           |
| 24/02/2020             | Expansion of border closure to include denial of entry from additional Asian countries                                                                                                                               | Travel restriction                                             |
| 27/02/2020             | Italy travel warning and quarantine requirement                                                                                                                                                                      | Travel restriction. Isolation/quarantine guidelines            |
| <b>MAR 2020</b>        |                                                                                                                                                                                                                      |                                                                |
| 04/03/2020             | Initial guidelines including limitations on mass gatherings, isolation & quarantine for returning travelers, & travel restrictions                                                                                   | Travel restriction, Isolation/quarantine, Activity restriction |
| 10/03/2020             | Purim                                                                                                                                                                                                                | Holiday (Jewish)                                               |
| 17/03/2020-19/04/2020  | Full lockdown including banning gatherings over 10 people, closure of educational institutions, venues and shops, reduction of public transport, 100m radius restriction on leaving a place of residence.            | LOCKDOWN                                                       |
| 18/03/2020             | Denial of entry into Israel by foreign nationals                                                                                                                                                                     | Travel restriction                                             |
| 25/03/2020             | Ziyarat al-Nabi Shu'ayb festivities cancelled                                                                                                                                                                        | Holiday (Druze)                                                |
| <b>APR 2020</b>        |                                                                                                                                                                                                                      |                                                                |
| 07/04/2020             | Masks required above age 6 years                                                                                                                                                                                     | Government decision                                            |
| 07/04/2020- 12/04/2020 | No public transit or flights                                                                                                                                                                                         | Activity restriction                                           |
| 08/04/2020-16/04/2020  | Pesach                                                                                                                                                                                                               | Holiday (Jewish)                                               |
| 23/04/2020-10/05/2020  | Closure of stores overnight in Muslim cities and towns                                                                                                                                                               | Activity restriction                                           |
| 23/04/2020-24/05/2020  | Ramadan                                                                                                                                                                                                              | Holiday (Muslim)                                               |
| 25/04/2020-26/04/2020  | Allowances for outdoor prayer, weddings, mental health treatments, restaurants, street shops, cosmetic services                                                                                                      | Activity allowance                                             |
| 28/04/2020-29/04/2020  | Yom HaZikaron and Yom HaAtzmaut                                                                                                                                                                                      | Holiday (Israeli)                                              |
| <b>MAY 2020</b>        |                                                                                                                                                                                                                      |                                                                |
| 04/05/2020-10/05/2020  | Continual opening of non-essential and leisure services, permitting of gatherings, removal of limitation on distance from place of residence, allowances to isolate at home rather than hotel facilities             | Activity allowance                                             |
| 10/05/2020             | Opening of preschools and kindergartens                                                                                                                                                                              | Educational allowance                                          |
| 12/05/2020             | Lag BaOmer                                                                                                                                                                                                           | Holiday (Jewish)                                               |
| 17/05/2020             | Opening of schools in accordance with local authorities' decisions                                                                                                                                                   | Educational allowance                                          |
| 24/05/2020-26/05/2020  | Eid El Fitr                                                                                                                                                                                                          | Holiday (Muslim)                                               |
| 26/05/2020             | Resumption of activities such as eateries, pools and tourism                                                                                                                                                         | Activity allowance                                             |
| <b>JUNE 2020</b>       |                                                                                                                                                                                                                      |                                                                |
| 14/06/2020             | Increase in allowances for attendees/participants of religious rites and cultural events                                                                                                                             | Activity allowance                                             |
| <b>JULY 2020</b>       |                                                                                                                                                                                                                      |                                                                |
| 02/07/2020             | Limitation of permitted number of people allowed in event venues and houses of prayer                                                                                                                                | Activity restriction                                           |
| <b>AUG 2020</b>        |                                                                                                                                                                                                                      |                                                                |
| 11/08/2020             | Reintroduction of cultural events in a limited capacity                                                                                                                                                              | Activity allowance                                             |
| 16/08/2020             | Reopening of travel to select European countries, a "green list" countries that do not require quarantine upon entry to Israel                                                                                       | Travel allowance                                               |
| <b>SEPT 2020</b>       |                                                                                                                                                                                                                      |                                                                |
| 01/09/2020             | School year postponed in red cities except for special education programs and programs for at-risk youth                                                                                                             | Education restriction                                          |
| 08/09/2020             | Nightly curfew in red cities, restricted to 500m distance from one's place of residence, between 7pm-5am                                                                                                             | Local travel restriction                                       |
| 18/09/2020-18/10/2020  | Full lockdown: maximum permitted capacity for prayers over the High Holidays, 500m radius restriction on leaving one's residence, closure of businesses and places open to the public, reduction of public transport | LOCKDOWN                                                       |

|                       |                                                                                                                                                                                                                                                               |                                                       |
|-----------------------|---------------------------------------------------------------------------------------------------------------------------------------------------------------------------------------------------------------------------------------------------------------|-------------------------------------------------------|
| 18/09/2020-20/09/2020 | Rosh Hashana                                                                                                                                                                                                                                                  | Holiday (Jewish)                                      |
| 23/09/2020            | Closure of Ben Gurion airport for outgoing flights                                                                                                                                                                                                            | Travel restrictions                                   |
| 28/09/2020            | Yom Kippur                                                                                                                                                                                                                                                    | Holiday (Jewish)                                      |
| <b>OCT 2020</b>       |                                                                                                                                                                                                                                                               |                                                       |
| 03/10/2020-10/10/2020 | Sukkot                                                                                                                                                                                                                                                        | Holiday (Jewish)                                      |
| 18/10/2020            | Reopening of preschools and kindergartens, workplaces, restaurant takeaway services, lifting of restrictions on leaving the house, expanded allowed capacity for gatherings                                                                                   | Activity allowances                                   |
| <b>NOV 2020</b>       |                                                                                                                                                                                                                                                               |                                                       |
| 01/11/2020            | Grades 1-4 return to school                                                                                                                                                                                                                                   | Educational allowance                                 |
| 08/11/2020            | Street-side stores permitted to reopen                                                                                                                                                                                                                        | Activity allowance                                    |
| 18/11/2020            | "Green islands" in Eilat and the Dead Sea, allowances for eateries, tourism and shopping                                                                                                                                                                      | Travel and Activity allowance                         |
| 24/11/2020            | Grades 5-6 return to school                                                                                                                                                                                                                                   | Educational allowance                                 |
| 26/11/2020-08/12/2020 | Opening of select malls and museums                                                                                                                                                                                                                           | Activity allowance                                    |
| <b>DEC 2020</b>       |                                                                                                                                                                                                                                                               |                                                       |
| 06/12/2020            | Grades 10-12 return to school in green and yellow cities                                                                                                                                                                                                      | Educational allowance                                 |
| 08/12/2020-23/12/2020 | Broad opening of malls, markets and museums                                                                                                                                                                                                                   | Activity allowance                                    |
| 20/12/2020            | First day of vaccinations                                                                                                                                                                                                                                     | Vaccinations                                          |
| 20/12/2020            | All locations considered "red", all international passengers required to go into 14-day quarantine in hotels                                                                                                                                                  | Travel restriction<br>Isolation/quarantine guidelines |
| 23/12/2020            | Denial of entry into Israel from countries with new variants                                                                                                                                                                                                  | Travel restriction                                    |
| 24/12/2020-25/12/2020 | Christmas                                                                                                                                                                                                                                                     | Holiday (Christian)                                   |
| 27/12/2020-07/01/2021 | Closure of all non-essential stores and services, 1km radius restriction on leaving one's residence, limitations on gatherings, reduction of public transport capacity. Continued in-person education for preschool-Grade 4, Grades 11-12 & special education | LOCKDOWN                                              |
| 28/12/2020            | Cancellation of "Green islands" designation of Eilat and the Dead Sea                                                                                                                                                                                         | Travel restriction                                    |
| <b>JAN 2021</b>       |                                                                                                                                                                                                                                                               |                                                       |
| 07/01/2021-07/02/2021 | Further lockdown including further limitation of gatherings, educational institutions closed, permit to travel abroad limited, closure of all public and commercial establishments                                                                            | LOCKDOWN (tightening)                                 |
| 08/01/2021-09/03/2021 | Inbound passengers arriving from select countries must quarantine in hotels                                                                                                                                                                                   | Isolation/quarantine guidelines                       |
| 24/01/2021-06/03/2021 | Closure of Ben Gurion airport for all inbound and outbound flights.                                                                                                                                                                                           | Travel restriction                                    |
| <b>FEB 2021</b>       |                                                                                                                                                                                                                                                               |                                                       |
| 04/02/2021            | Vaccination certificates exempting holders from quarantine                                                                                                                                                                                                    | Vaccinations                                          |
| 07/02/2021            | Reopening of workplaces, restaurant takeaway services, lifting of restrictions on leaving the house                                                                                                                                                           | Activity allowances                                   |
| 11/02/2021            | Preschool-Grade 4 return to school in green, yellow and some light orange cities                                                                                                                                                                              | Educational allowance                                 |
| 14/02/2021            | Incoming passengers must present negative PCR test prior to departure and retest after arriving                                                                                                                                                               | Travel restriction                                    |
| 21/02/2021            | Grades 5,6,11,12 return to school in green, yellow and some light orange cities                                                                                                                                                                               | Educational allowance                                 |
| 21/02/2021            | Green Passport for people who have received both doses of the vaccine, or recovered.<br>Broad opening of malls, markets, museums and houses of worship                                                                                                        | Activity allowance                                    |
| 25/02/2021-28/02/2021 | Nightly curfew 8:30pm-5:00am with travel restricted within 1km, no gatherings, business closures                                                                                                                                                              | Activity restriction                                  |
| 26/02/2021            | Purim                                                                                                                                                                                                                                                         | Holiday (Jewish)                                      |
| <b>MAR 2021</b>       |                                                                                                                                                                                                                                                               |                                                       |
| 07/03/2021            | Grades 7-10 return to school in green, yellow and some light orange cities                                                                                                                                                                                    | Educational allowance                                 |
| 07/03/2021            | Broad reopening and varied allowances for Green Passport holders                                                                                                                                                                                              | Activity allowance                                    |
| 07/03/2021            | Up to 3000 Israelis can enter Israel per day                                                                                                                                                                                                                  | Travel allowance                                      |
